# Supplementary material for: Exogenous Kinetin Modulates ROS Homeostasis to Affect Heat Tolerance in Rice Seedlings
Source: MDPI journal article supplement (doi:10.3390/ijms24076252), 2023-03-26
Supplement: s1 [file s1]

## Supplementary Materials

**Table S1.** The list of RT-qPCR primer pairs.

| Primer name                | Sequence (5'-3')          |
|----------------------------|---------------------------|
| <i>OsActin1-F</i>          | GACCTTCAACACCCCTGCTA      |
| <i>OsActin1-R</i>          | GAGTCCAACACAATACCTGTGG    |
| <i>OsCATB-F</i>            | GTTTCGGTTCTCCACAGTCGT     |
| <i>OsCATB-R</i>            | CCCTCCATGTGCCTGTAGTT      |
| <i>OsAPX1-F</i>            | CCAAGGGTTCTGACCACCTA      |
| <i>OsAPX1-R</i>            | CAGTTCGGAGAGCTTGAGGT      |
| <i>Fe<sup>+</sup>SOD-F</i> | CTTGATGCCCTGGAACCTTA      |
| <i>Fe<sup>+</sup>SOD-R</i> | GCCAGACCCCAAAAGTGATA      |
| <i>OsLEA3-F</i>            | TCACTTCAAATTCGGTGCAA      |
| <i>OsLEA3-R</i>            | CACACCCGTCAGAAATCCTC      |
| <i>OsDREB2A-F</i>          | GGAATCTCCTCCTTTCATCGTG    |
| <i>OsDREB2A-R</i>          | TTCCGCTCCTGACAAACACG      |
| <i>OsSNAC1-F</i>           | CATGGTCCCGTTCTGAGGTG      |
| <i>OsSNAC1-R</i>           | CACACGTTGCAGCATCGATC      |
| <i>OsHSP70-F</i>           | GCCAAGCGTCAAGCAGTGACCAA   |
| <i>OsHSP70-R</i>           | GGTCATCAAAGCGCCGCCCTAT    |
| <i>OsHSP90-F</i>           | TTTGGGCGAAGGTGACACTGCTA   |
| <i>OsHSP90-R</i>           | TGGCAATGGTCCCAAGGTTCTTAAT |
| <i>OsHsfA2d-F</i>          | CAAGAGATGATGCTGGGATTCC    |
| <i>OsHsfA2d-R</i>          | CTATTGCTTAGATAAACCAGCT    |
| <i>OsRR2-F</i>             | CATGGTGATGAATGCATCC       |
| <i>OsRR2-R</i>             | TGCTGCCATTGGACCATCT       |
| <i>OsRR4-F</i>             | TGAAGCTGCAACAGCTCA        |
| <i>OsRR4-R</i>             | AGTGGAGGACAATCTTGG        |
| <i>OsRR6-F</i>             | CTTCTTCTGCTGCTGCCTCAAAC   |
| <i>OsRR6-R</i>             | GATTGATGCTCTGGTGCCATTTC   |
